# Supplementary material for: Magnetic-field-induced molecular alignment in an achiral liquid crystal spin-labeled by a nitroxyl group in the mesogen core
Source: Royal Society of Chemistry journal article supplement (doi:10.1039/b809502g), 2008-12-03
Supplement: b809502g.pdf [file b809502g.pdf]

## Magnetic-field-induced molecular alignment in the achiral liquid crystal spin-labeled by a nitroxyl group in the mesogen core

Yoshiaki Uchida,<sup>a</sup> Rui Tamura,\*<sup>a</sup> Naohiko Ikuma,<sup>a</sup> Satoshi Shimono,<sup>a</sup> Jun Yamauchi,<sup>a</sup> Yoshio Shimbo,<sup>b</sup> Hideo Takezoe,<sup>b</sup> Yoshio Aoki<sup>c</sup> and Hiroyuki Nohira<sup>c</sup>

<sup>s</sup> Received (in XXX, XXX) 1st January 2008 accepted 1st January 2008

First published on the web 1st January 2008

DOI: 10.1039/b000000x

### Electronic Supplementary Information

10

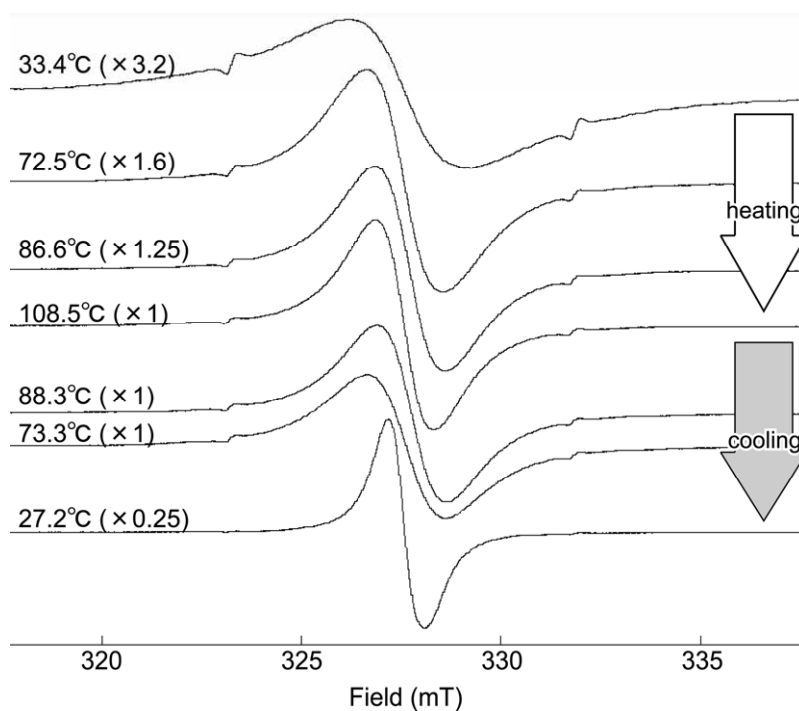

**Fig. S1** Selected EPR spectra of (±)-1 measured at various temperatures from the crystalline phase (top) to the supercooled phase (bottom) through the LC and isotropic phases.

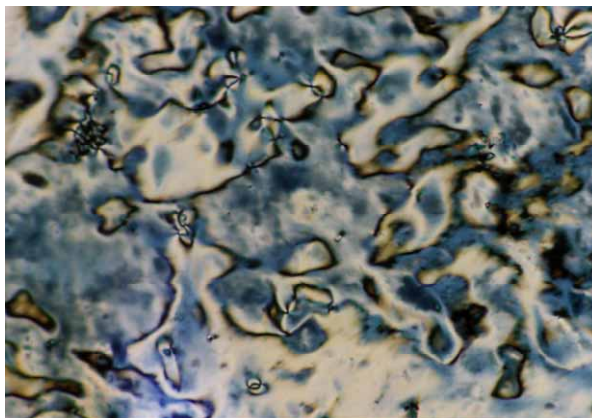

5

**Fig. S2** Polarized optical micrographs showing a SmC Schlieren texture of (±)-1 at 76°C.

10

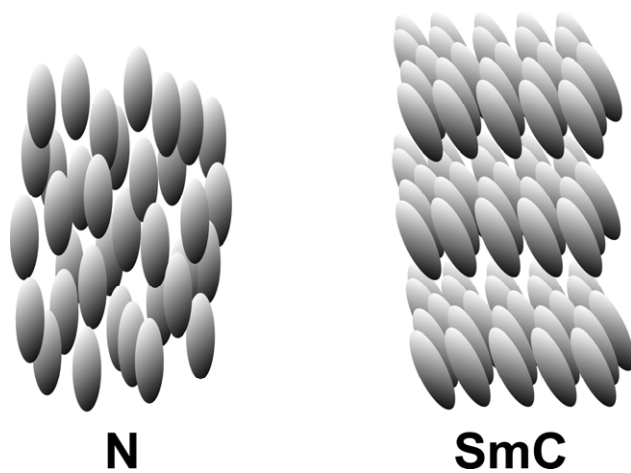

**Fig. S3** Molecular arrangement in N and SmC phases. A molecule is represented as an ellipsoid.

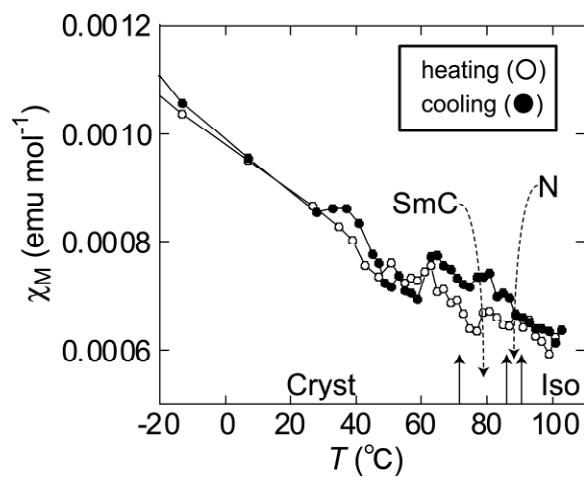

**Fig. S4** Temperature dependence of the magnetic susceptibility of ( $\pm$ )-1 at a magnetic field of 2.0 T. Measured through the first heating (white circle) and cooling (black circle) processes.
